# Supplementary material for: Population Pharmacokinetic Analysis and Dosing Optimization of Prophylactic Fluconazole in Japanese Patients with Hematological Malignancy
Source: J Fungi (Basel). 2021 Nov 16;7(11):975. doi: 10.3390/jof7110975 (PMC8618010; doi:10.3390/jof7110975)
Supplement: Supplementary file 1 [file jof-07-00975-s001.zip › jof-1423684-supplementary.pdf]

CLcr = 40 mL/min BW = 40 kg

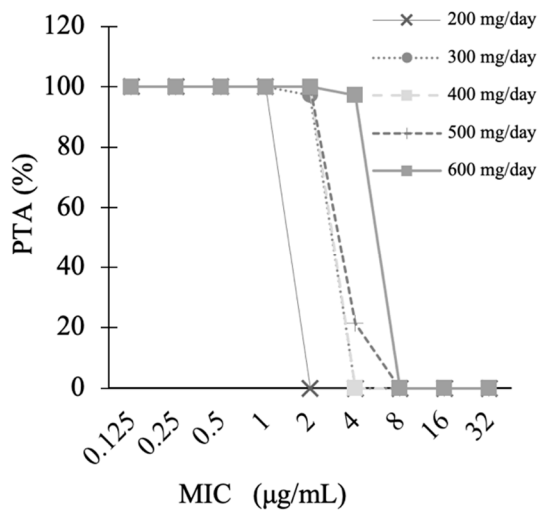

CLcr = 40 mL/min BW = 50 kg

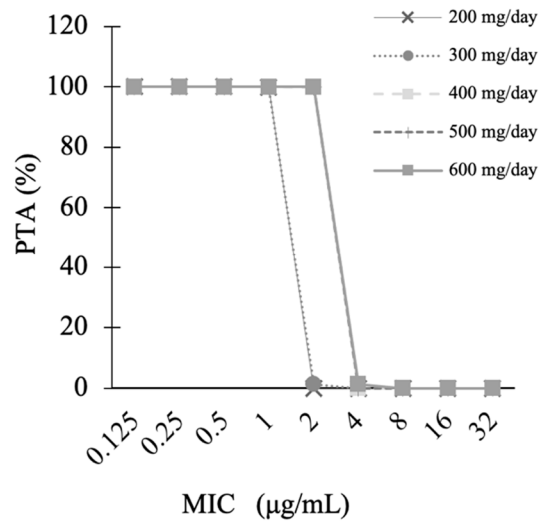

CLcr = 40 mL/min BW = 60 kg

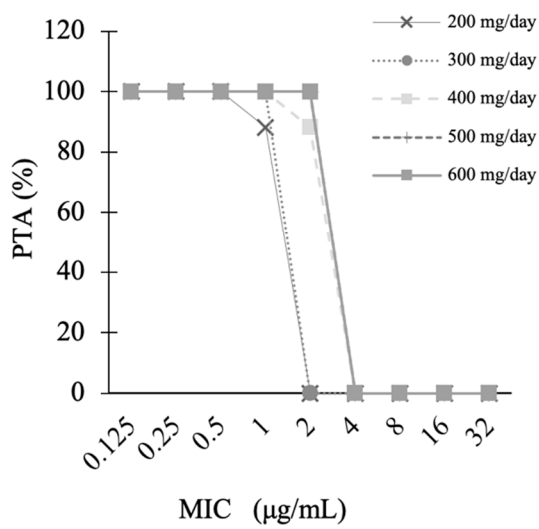

CLcr = 40 mL/min BW = 70 kg

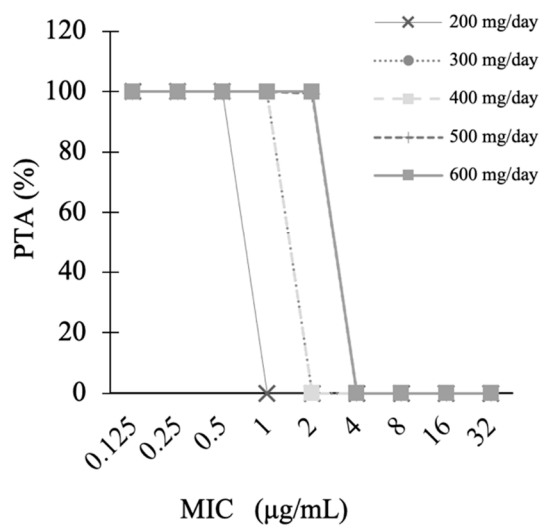

Continued.

CLcr = 60 mL/min BW = 40 kg

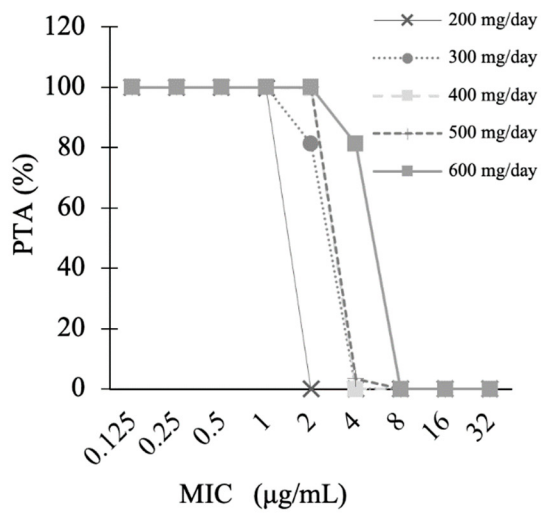

CLcr = 60 mL/min BW = 50 kg

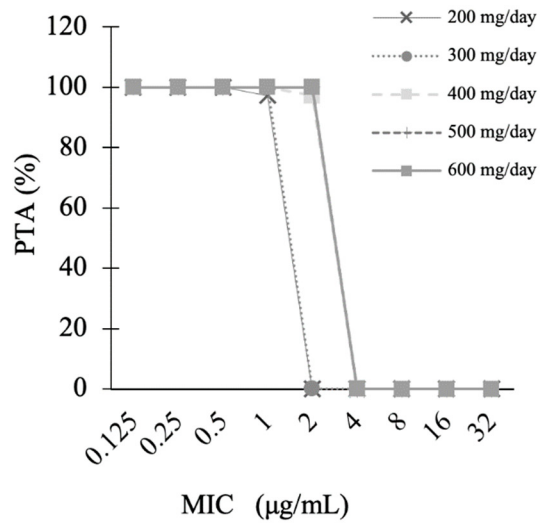

CLcr = 60 mL/min BW = 60 kg

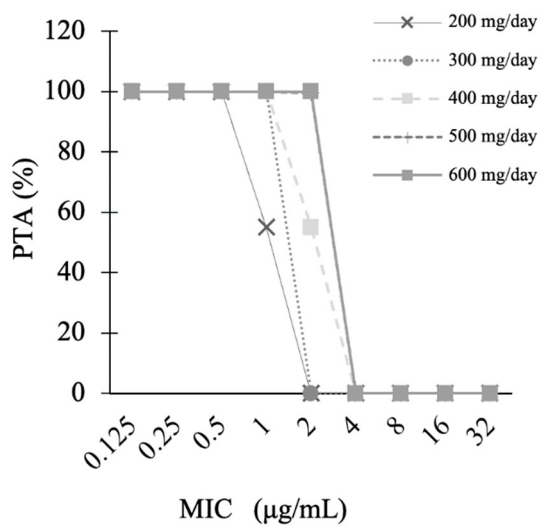

CLcr = 60 mL/min BW = 70 kg

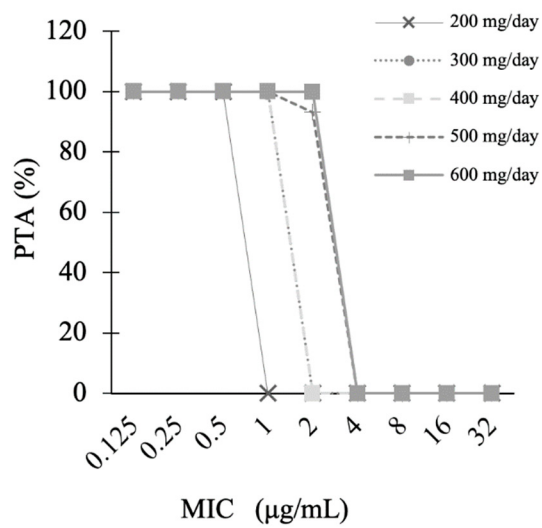

Continued.

CLcr = 100 mL/min BW = 40 kg

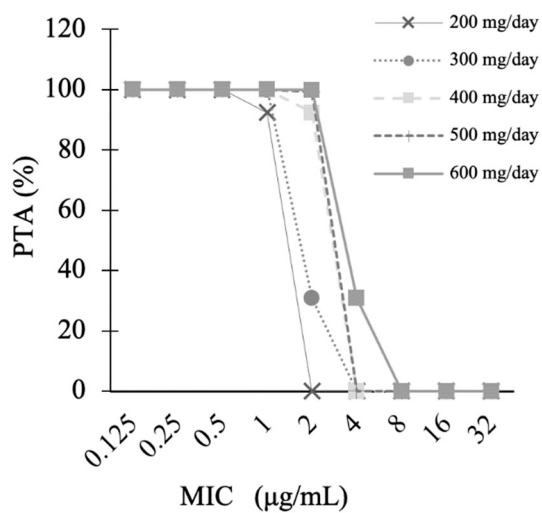

CLcr = 100 mL/min BW = 50 kg

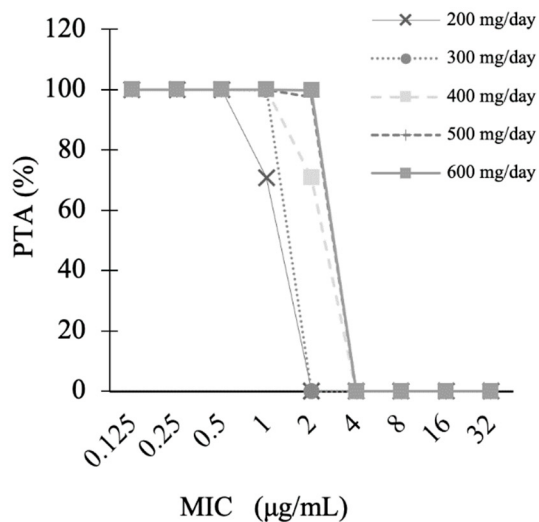

CLcr = 100 mL/min BW = 60 kg

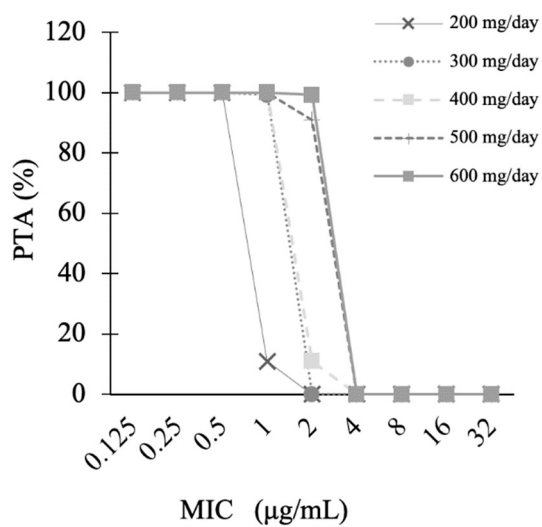

CLcr = 100 mL/min BW = 70 kg

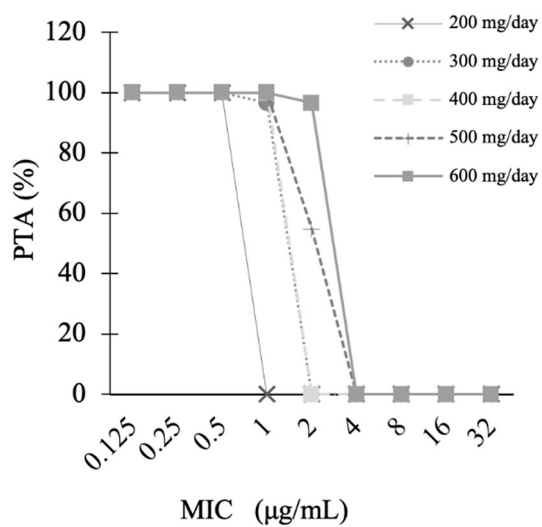

Continued.

CLcr = 120 mL/min BW = 40 kg

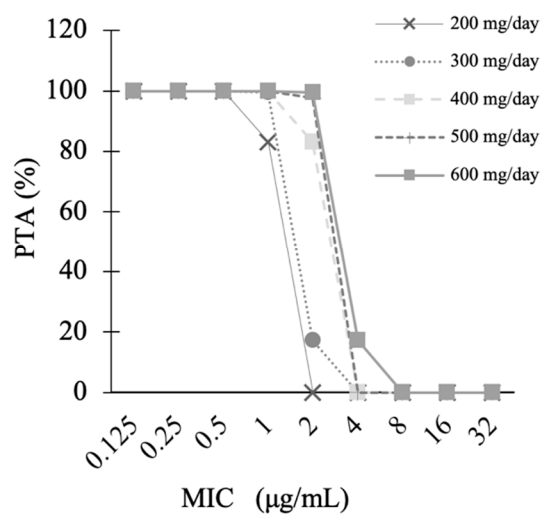

CLcr = 120 mL/min BW = 50 kg

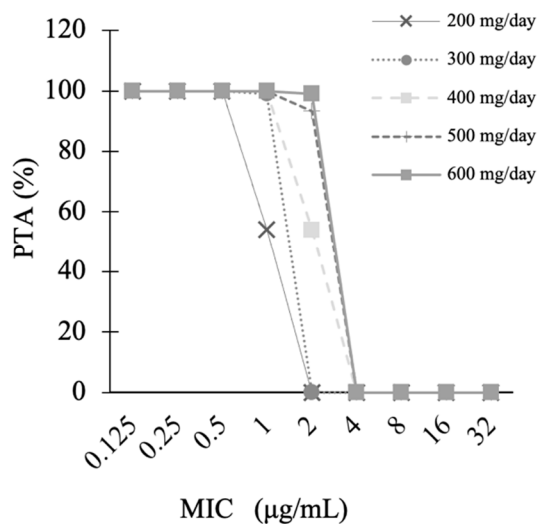

CLcr = 120 mL/min BW = 60 kg

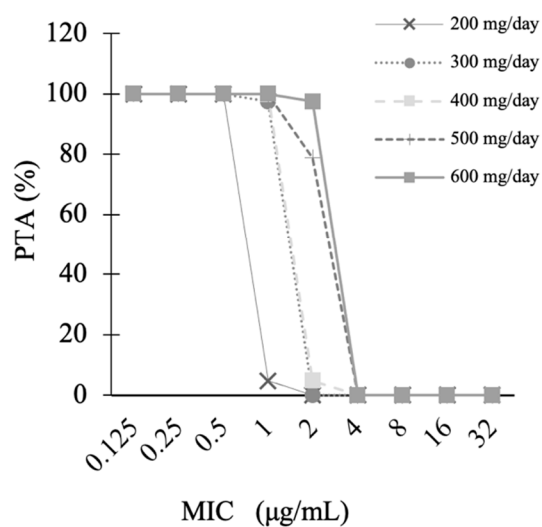

CLcr = 120 mL/min BW = 70 kg

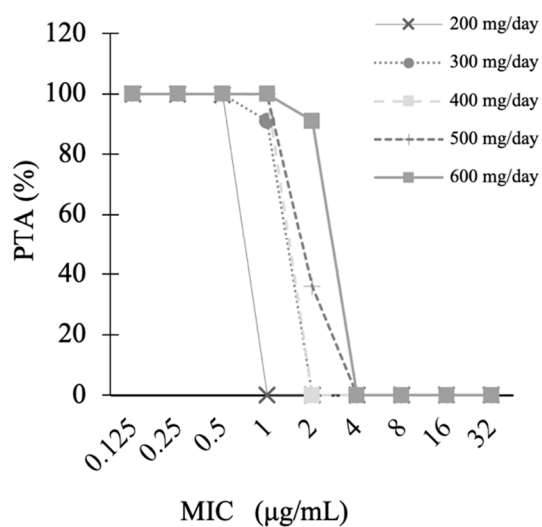

Continued.

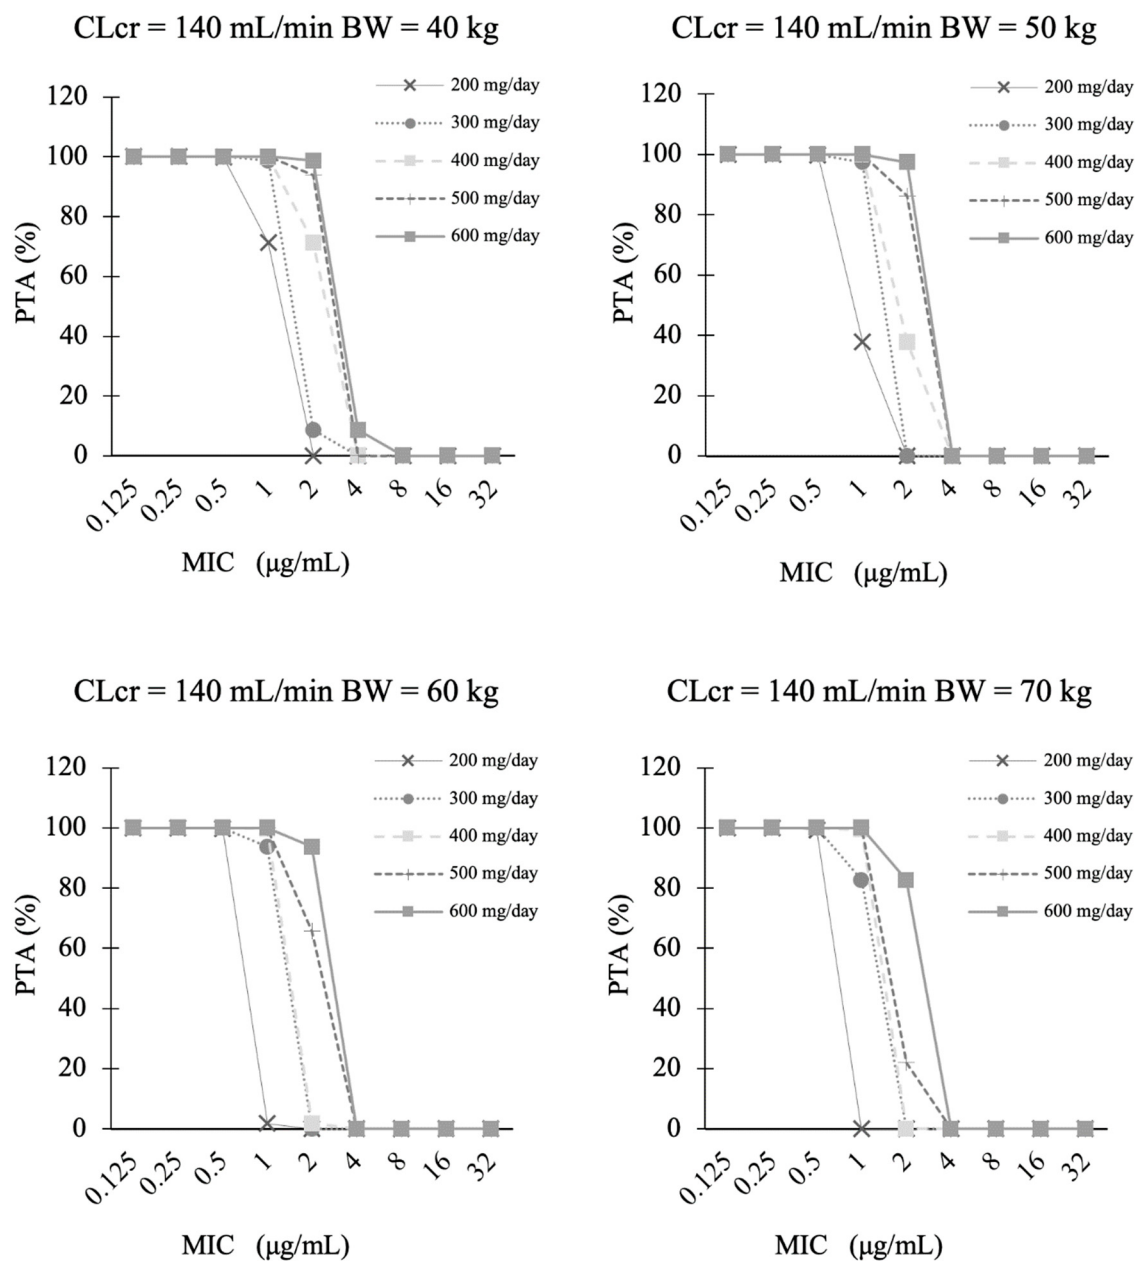

**Figure S1.** Probability of target attainment (PTA) of  $f$  AUC/ MIC ratio  $\geq 50$  after fluconazole loading doses of 200mg, 300mg, 400mg, 500mg, and 600 mg administered on Day1 (0–24hr). Target MIC is 2  $\mu\text{g/mL}$ , and CLcr (Cockcroft-Gault equation) is 40, 60, 100, 120, and 140 mL/min. CLcr 80mL/min is shown in Fig 3.

CLcr = 40 mL/min BW = 40 kg

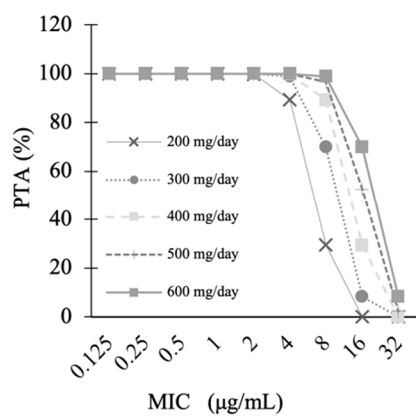

CLcr = 60 mL/min BW = 40 kg

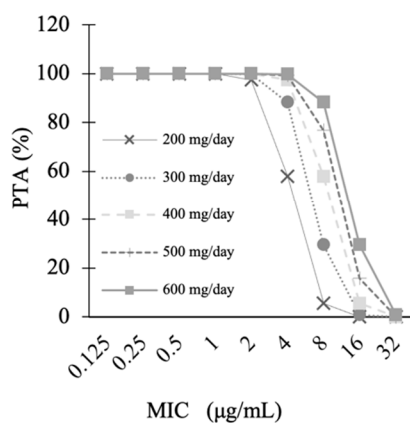

CLcr = 80 mL/min BW = 40 kg

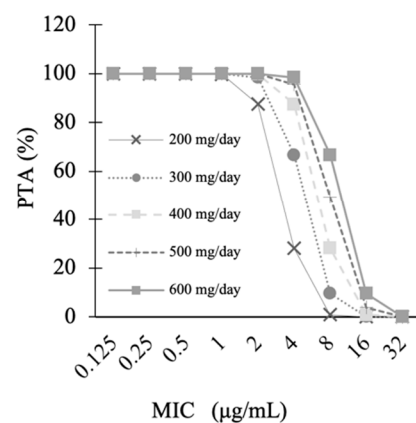

CLcr = 100 mL/min BW = 40 kg

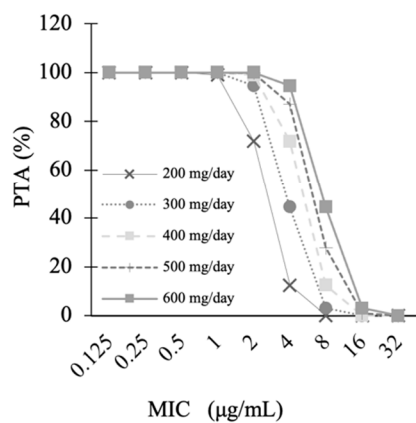

CLcr = 120 mL/min BW = 40 kg

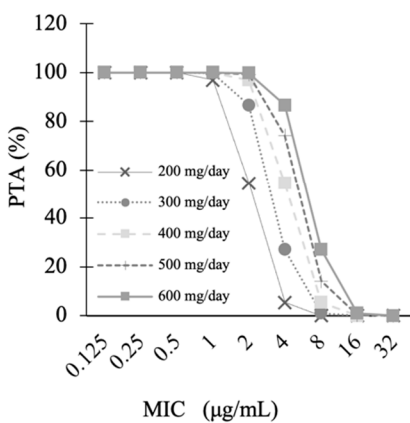

CLcr = 140 mL/min BW = 40 kg

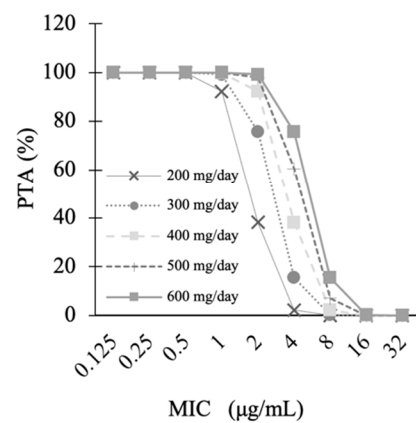

Continued.

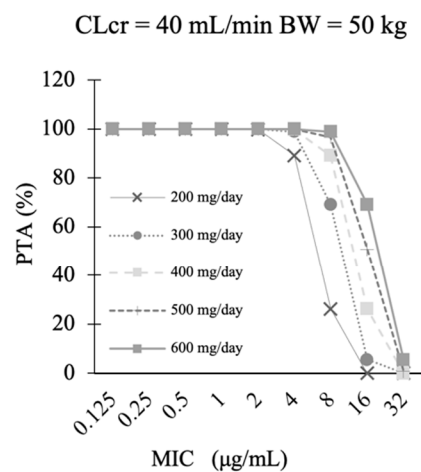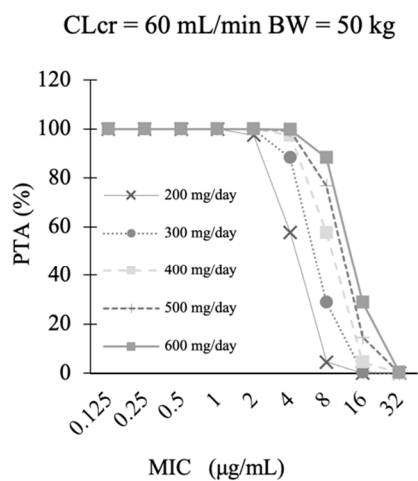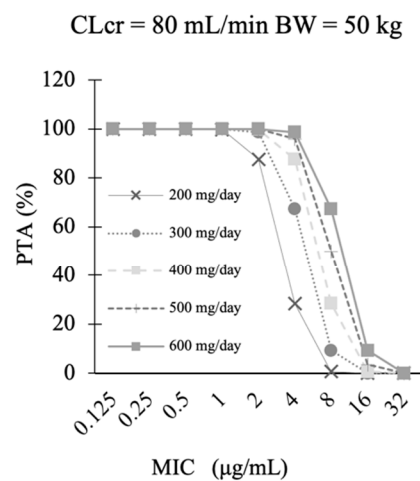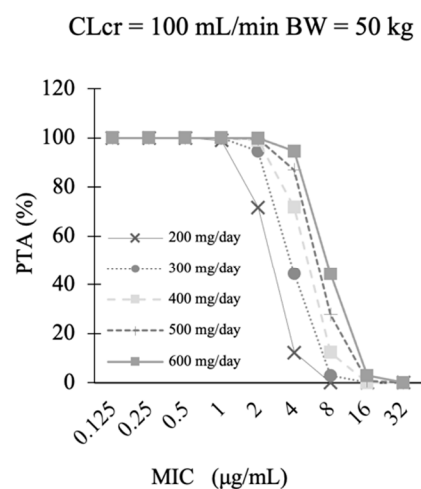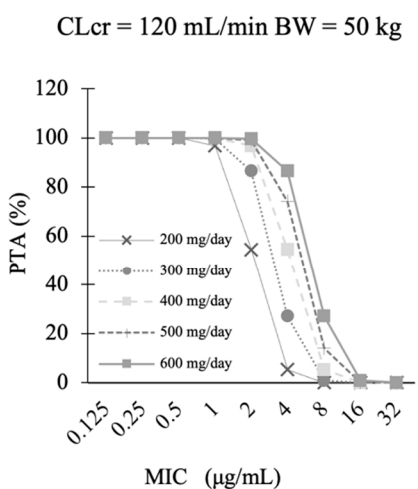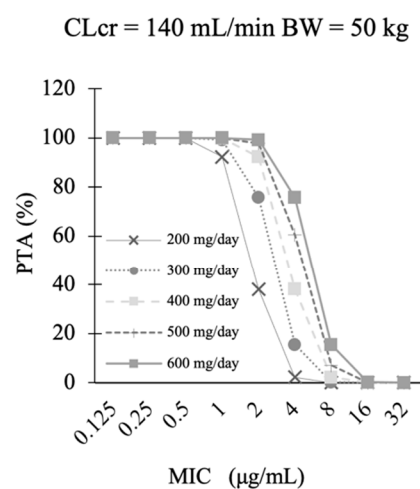

Continued.

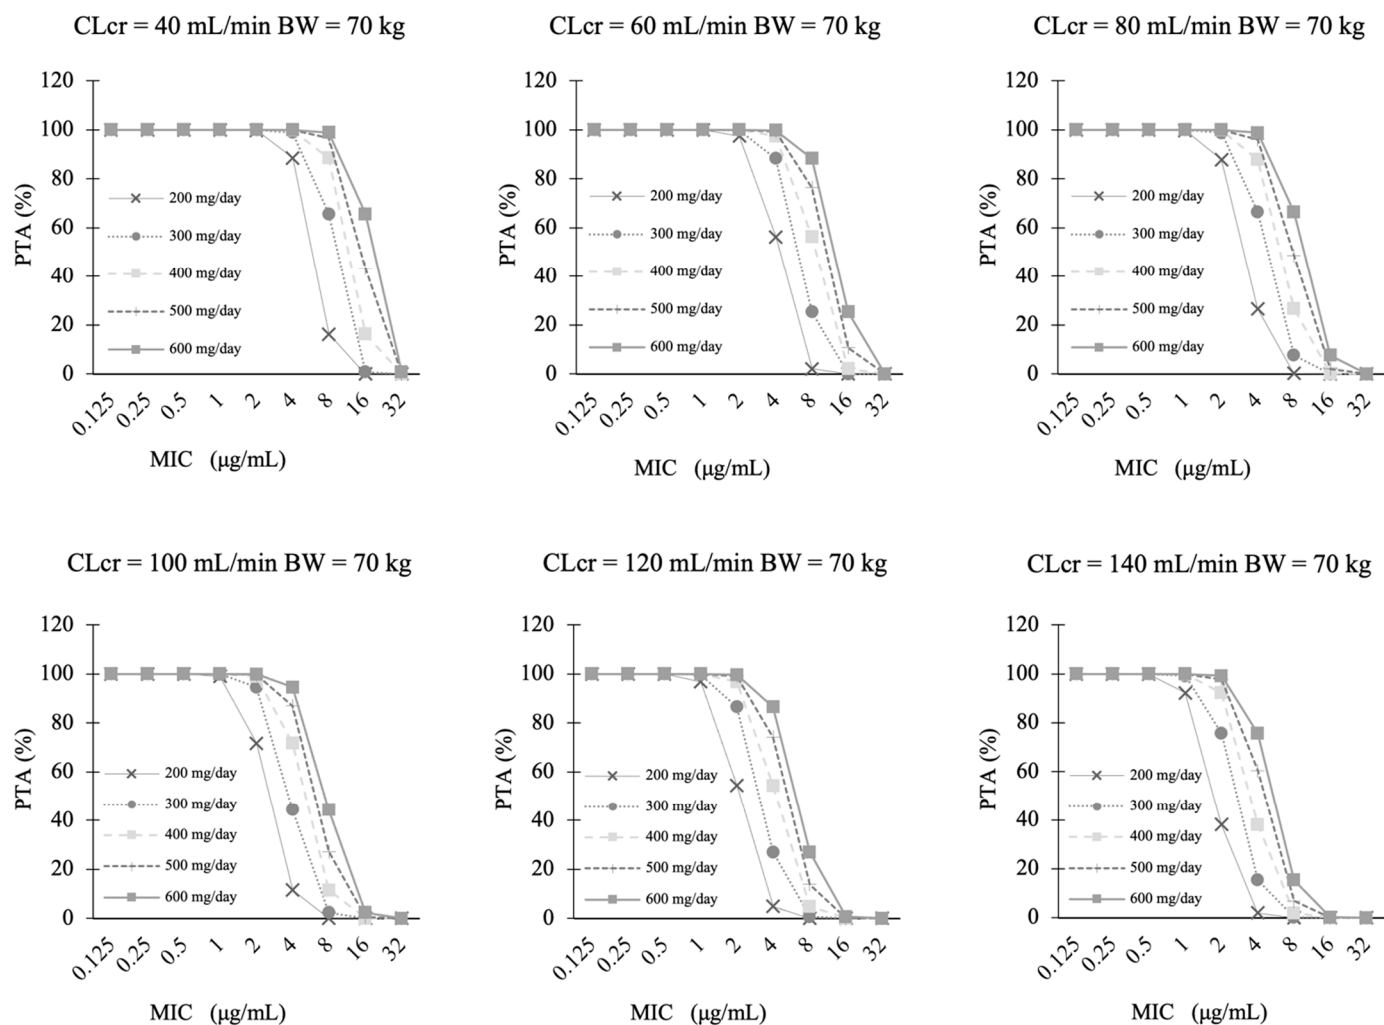

**Figure S2.** Probability of target attainment (PTA) of  $f$  AUC/MIC ratio  $\geq 50$  after fluconazole maintenance doses of 200mg, 300mg, 400mg, 500mg, and 600 mg administered on Day15 (336–360hr). Target MIC is 2  $\mu\text{g/mL}$ , and Body Weight is 40, 50, and 70 kg. Body Weight 60 kg is shown in Fig 4.
